# Supplementary material
Source: PubMed Central journal article supplement (PMC3770463)
Supplement: NIHMS469043-supplement-1.pdf [file NIHMS469043-supplement-1.pdf]

### Supplementary Table 1a

Sensory domain measures

| Sensory                               | Controls    | All TMD cases | TMD subgroups |            |            |
|---------------------------------------|-------------|---------------|---------------|------------|------------|
|                                       | Mean (SD)   | Mean (SD)     | Mean (SD)     |            |            |
|                                       |             |               | + 0 pain      | + 1 pain   | + ≥2 pain  |
| Heat pain tolerance (°C)*             | 47.2 (1.5)  | 47.0 (1.8)    | 46.6 (0.8)    | 47.3 (1.5) | 46.7 (2.2) |
| Heat pain temporal summation* (50°C)* | 6.5 (4.5)   | 8.1 (5.0)     | 7.7 (4.0)     | 7.9 (5.1)  | 8.3 (5.1)  |
| Heat pain single rating (50°C VAS)    | 31.4 (22.5) | 32.9 (21.3)   | 27.3 (17.3)   | 33.6(21.4) | 33.3(22.0) |
| Pressure pain threshold (Lat. Epi)*   | 5.1 (1.2)   | 4.5 (1.3)     | 4.5 (1.2)     | 4.8 (1.3)  | 4.2 (1.2)  |
| Widespread palpation tenderness (%)*  | 3           | 48            | 50            | 31         | 67         |
| # of tender points (0-18)*            | 0.5 (1.3)   | 6.1 (5.9)     | 4.6 (4.5)     | 4.1 (4.7)  | 8.6 (6.7)  |

*Abbreviations:* TMD, temporomandibular disorders; Lat. Epi, lateral epicondyle.

*Note:* Number of study subjects included in each group for pain characteristics varies based on available information. For controls: n=128~131; for TMD cases: n=156~159 (TMD + 0 pain: 13~14; TMD +1 pain: 76~78; TMD + ≥2 pain: 67)

\*p<0.10 between control and TMD subgroups

### Supplementary Table 1b

Sensory domain: % of individuals within risk zones

| Sensory                             | Controls | All TMD cases | TMD subgroups |          |           |
|-------------------------------------|----------|---------------|---------------|----------|-----------|
|                                     | (%)      | (%)           | (%)           |          |           |
|                                     |          |               | + 0 pain      | + 1 pain | + ≥2 pain |
| Heat pain tolerance (°C)            | 26       | 30            | 43            | 27       | 31        |
| Heat pain temporal summation (50°C) | 28       | 40            | 46            | 38       | 40        |
| Heat pain single rating (50°C VAS)  | 26       | 29            | 34            | 29       | 28        |
| Pressure pain threshold (Lat. Epi)  | 25       | 35            | 43            | 27       | 43        |
| Widespread palpation tenderness     | 3        | 49            | 50            | 31       | 67        |
| # of tender points*                 | 22       | 78            | 71            | 73       | 85        |

*Abbreviations:* TMD, temporomandibular disorders; Lat. Epi, lateral epicondyle.

*Note:* Number of study subjects included in each group for pain characteristics varies based on available information. For controls: n=128~131; for TMD cases: n=156~159 (TMD + 0 pain: 13~14; TMD +1 pain: 76~78; TMD + ≥2 pain: 67)

\* The 75 percentile of controls has "0" tender points.

### Supplementary Table 2a

Autonomic domain measures

| Autonomic       | Controls<br>Mean (SD) | All TMD cases<br>Mean (SD) | TMD subgroups |             |             |
|-----------------|-----------------------|----------------------------|---------------|-------------|-------------|
|                 |                       |                            | + 0 pain      | + 1 pain    | + ≥2 pain   |
| SBP (mmHg)*     | 111 (10)              | 115 (10)                   | 112 (6)       | 113 (10)    | 117 (11)    |
| DBP (mmHg)*     | 68 (7)                | 71 (7)                     | 71 (5)        | 70 (6)      | 72 (8)      |
| HR (beats/min)* | 71 (11)               | 74 (13)                    | 71 (10)       | 72 (12)     | 77 (15)     |
| SBP x HR*       | 7881 (1633)           | 8564 (1977)                | 8022 (1342)   | 8238 (1737) | 9052 (2245) |

*Abbreviations:* TMD, temporomandibular disorders; SBP, systolic blood pressure; DBP, diastolic blood pressure; HR, heart rate.

*Note:* Number of study subjects included in each group for pain characteristics varies based on available information. For controls: n=130; for TMD cases: n=158 (TMD + 0 pain: 14; TMD +1 pain: 77; TMD + ≥2 pain: 67)

\*p<0.10 between control and TMD subgroups

### Supplementary Table 2b

Autonomic domain: % of individuals within risk zones

| Autonomic | Controls<br>(%) | All TMD cases<br>(%) | TMD subgroups |          |           |
|-----------|-----------------|----------------------|---------------|----------|-----------|
|           |                 |                      | + 0 pain      | + 1 pain | + ≥2 pain |
| SBP       | 26              | 46                   | 29            | 39       | 58        |
| DPB       | 27              | 43                   | 29            | 36       | 54        |
| HR        | 25              | 32                   | 21            | 30       | 37        |
| SBP*HR    | 25              | 37                   | 29            | 30       | 46        |

*Abbreviations:* TMD, temporomandibular disorders; SBP, systolic blood pressure; DBP, diastolic blood pressure; HR, heart rate.

*Note:* Number of study subjects included in each group for pain characteristics varies based on available information. For controls: n=130; for TMD cases: n=158 (TMD + 0 pain: 14; TMD +1 pain: 77; TMD + ≥2 pain: 67)

### Supplementary Table 3a

Inflammatory domain measures

| Inflammatory | Controls       | All TMD cases  | TMD subgroups  |                |                |
|--------------|----------------|----------------|----------------|----------------|----------------|
|              | Mean (SD)      | Mean (SD)      | + 0 pain       | + 1 pain       | + ≥2 pain      |
| IL-6*        | 2.0 (2.1)      | 2.7 (2.2)      | 2.1 (1.7)      | 2.6 (2.2)      | 2.9 (2.4)      |
| IL-8         | 47.3(40.1)     | 54.2 (40.5)    | 46.8 (27.5)    | 58.1 (44.3)    | 51.4 (38.3)    |
| TNF-α        | 3.1 (1.5)      | 3.4 (1.5)      | 3.1 (1.5)      | 3.3 (1.4)      | 3.6 (1.7)      |
| MCP-1*       | 75.6 (21.7)    | 91.4 (24.2)    | 82.2 (23.7)    | 89.1 (24.3)    | 95.9 (23.7)    |
| MIP-1β*      | 57.1 (31.8)    | 65.2 (34.7)    | 65.6 (37.6)    | 57.6 (31.3)    | 73.9 (36.1)    |
| G-CSF        | 23.0 (11.4)    | 23.7 (11.6)    | 20.8 (8.4)     | 24.8 (12.7)    | 22.9 (11.5)    |
| TPO*         | 561.5 (190.2)  | 643.0 (169.1)  | 679.9 (159.1)  | 636.0 (167.8)  | 645.0 (174.3)  |
| VEGF*        | 84.2 (70.3)    | 106.0 (72.4)   | 147.7 (68.1)   | 101.5 (70.6)   | 104.1 (74.2)   |
| ENA-78       | 7748.9(3975.0) | 8651.9(3820.0) | 8187.1(3108.2) | 8518.7(4038.7) | 8905.7(3731.1) |
| FGF*         | 126.1(101.7)   | 160.0 (131.2)  | 127.2(117.3)   | 156.6(128.1)   | 171.1 (137.9)  |
| IL-1ra*      | 361.5 (213.2)  | 466.3 (301.7)  | 327.3 (320.5)  | 469.1 (286.8)  | 493.0 (310.8)  |

*Abbreviations:* TMD, temporomandibular disorders; IL-6, interleukin-6; IL-8, interleukin-8; TNF-α, tumor necrosis factor-α; MCP-1, monocyte chemotactic protein-1; MIP-1β, macrophage inflammatory protein-1β; G-CSF, granulocyte colony stimulating factor; TPO, thrombopoietin; VEGF, vascular endothelial growth factor ; ENA-78, epithelial-derived neutrophil-activating peptide 78; FGF, fibroblast growth factor basic; and IL-1ra, interleukin-1 receptor antagonist.

Note: Number of study subjects included in each group for pain characteristics varies based on available information. For controls: n=117~ 126; for TMD cases: n=135~154 (TMD + 0 pain: 10~14; TMD +1 pain: 69 ~75; TMD + ≥2 pain: 56 ~ 65)

\*p<0.10 between control and TMD subgroups

### Supplemental Table 3b

Inflammatory domain: % of individuals within risk zones

| Inflammatory  | Controls<br>(%) | All TMD cases<br>(%) | TMD subgroups<br>(%) |          |           |
|---------------|-----------------|----------------------|----------------------|----------|-----------|
|               |                 |                      | + 0 pain             | + 1 pain | + ≥2 pain |
| IL-6          | 25              | 30                   | 21                   | 29       | 32        |
| IL-8          | 25              | 38                   | 14                   | 32       | 26        |
| TNF- $\alpha$ | 26              | 29                   | 29                   | 25       | 34        |
| MCP-1         | 26              | 53                   | 40                   | 48       | 63        |
| MIP-1 $\beta$ | 25              | 29                   | 36                   | 19       | 40        |
| G-CSF         | 26              | 28                   | 20                   | 30       | 27        |
| TPO           | 26              | 41                   | 50                   | 43       | 36        |
| VEGF          | 26              | 36                   | 60                   | 30       | 39        |
| ENA-78        | 25              | 32                   | 21                   | 33       | 34        |
| FGF           | 25              | 31                   | 21                   | 23       | 43        |
| IL-1ra        | 25              | 19                   | 43                   | 16       | 17        |

*Abbreviations:* TMD, temporomandibular disorders; IL-6, interleukin-6; IL-8, interleukin-8; TNF- $\alpha$ , tumor necrosis factor- $\alpha$ ; MCP-1, monocyte chemotactic protein-1; MIP-1 $\beta$ , macrophage inflammatory protein-1 $\beta$ ; G-CSF, granulocyte colony stimulating factor; TPO, thrombopoietin; VEGF, vascular endothelial growth factor ; ENA-78, epithelial-derived neutrophil-activating peptide 78; FGF, fibroblast growth factor basic; and IL-1ra, interleukin-1 receptor antagonist.

*Note:* Number of study subjects included in each group for pain characteristics varies based on available information. For controls: n=123~ 126; for TMD cases: n=135 ~154 (TMD + 0 pain: 10~14; TMD +1 pain: 69 ~75; TMD +  $\geq$ 2 pain: 56 ~65)

### Supplementary Table 4a

Psychological domain measures

| Psychological    | Controls<br>Mean (SD) | All TMD cases<br>Mean (SD) | TMD subgroups |              |              |
|------------------|-----------------------|----------------------------|---------------|--------------|--------------|
|                  |                       |                            | + 0 pain      | + 1 pain     | + ≥2 pain    |
| Stai_1*          | 29.2 (6.3)            | 34.5 (7.6)                 | 32.3 (7.7)    | 33.5 (6.4)   | 36.1 (8.6)   |
| Stai_2*          | 31.1 (7.7)            | 37.8 (9.7)                 | 35.9 (8.8)    | 37.1 (9.8)   | 39.1 (9.6)   |
| SCL90Depression* | 15.7 (3.2)            | 19.8 (6.9)                 | 17.5 (5.2)    | 19.1 (6.3)   | 21.2 (7.6)   |
| PCS*             | 6.0 (5.9)             | 11.2 (10.6)                | 6.2 (8.3)     | 11.2 (10.5)  | 12.4 (11.0)  |
| PILL*            | 85.3 (16.7)           | 115.4 (24.6)               | 98.4 (20.1)   | 109.2 (20.5) | 126.5 (25.5) |

*Abbreviations:* TMD, temporomandibular disorders; Stai\_1, Spielberger Trait Anxiety score; Stai\_2, Spielberger State Anxiety score; SCL90 Depression, Symptoms Checklist – 90 Revised depression subscale; PCS, Pain Catastrophizing Scale; PILL, Pennebaker Inventory of Limbic Languidness.

*Note:* Number of study subjects included in each group for pain characteristics varies based on available information. For controls: n=120~ 131; for TMD cases: n=149 ~159 (TMD + 0 pain: 14; TMD +1 pain: 73~78; TMD + ≥2 pain:62~67)

\*p<0.10 between control and TMD subgroups

### Supplementary Table 4b

Psychological domain: % of individuals within risk zones

| Psychological    | Controls<br>(%) | All TMD cases<br>(%) | TMD subgroups |          |           |
|------------------|-----------------|----------------------|---------------|----------|-----------|
|                  |                 |                      | + 0 pain      | + 1 pain | + ≥2 pain |
| Stai_1           | 26              | 57                   | 43            | 51       | 67        |
| Stai_2           | 27              | 52                   | 43            | 52       | 64        |
| SCL90 Depression | 27              | 62                   | 43            | 59       | 69        |
| PCS              | 27              | 41                   | 29            | 44       | 48        |
| PILL             | 25              | 79                   | 50            | 72       | 94        |

*Abbreviations:* TMD, temporomandibular disorders; Stai\_1, Spielberger Trait Anxiety score; Stai\_2, Spielberger State Anxiety score; SCL90 Depression, Symptoms Checklist – 90 Revised depression subscale; PCS, Pain Catastrophizing Scale; PILL, Pennebaker Inventory of Limbic Languidness.

*Note:* Number of study subjects included in each group for pain characteristics varies based on available information. For controls: n=120~ 131; for TMD cases: n=149 ~159 (TMD + 0 pain: 14; TMD +1 pain: 73~78; TMD + ≥2 pain:62~67)
